# Supplementary material for: La red como elemento de negocio
Source: Royal Society of Chemistry journal article supplement (doi:10.1039/d2nr05678j), 2010-01-01
Supplement: d2nr05678j1.pdf [file d2nr05678j1.pdf]

Supporting Information

# Hafnium-doped zirconia ferroelectric thin films with excellent endurance at high polarization

Yating Cao,<sup>a</sup> Wei Zhang<sup>\*a</sup> and Yubao Li<sup>\*a</sup>

<sup>a</sup> College of Physics Science and Technology, Hebei University, Baoding 071002, P.R. China

\* Corresponding authors. Email: [liyubao@hbu.edu.cn](mailto:liyubao@hbu.edu.cn) (Y. Li), [zhangw@hbu.edu.cn](mailto:zhangw@hbu.edu.cn) (W. Zhang)

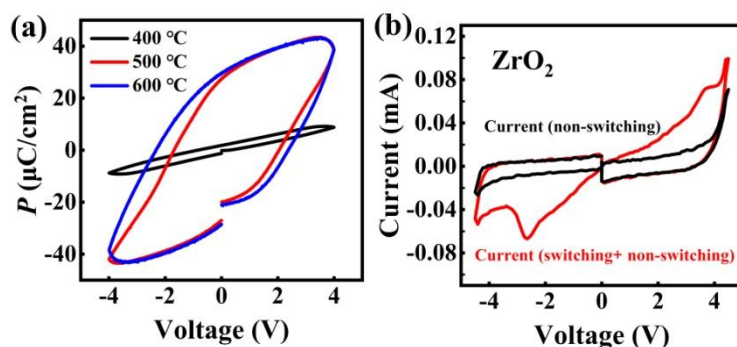

**Fig. S1** (a) Pristine  $P$ - $V$  hysteresis loops of W/ZrO<sub>2</sub>/W capacitors annealed at different temperatures. (b) The corresponding overall (switching plus non-switching) current and non-switching (capacitive and leakage) current curves of ZrO<sub>2</sub> annealed at 600 °C for the PUND result presented in Fig. 2a.

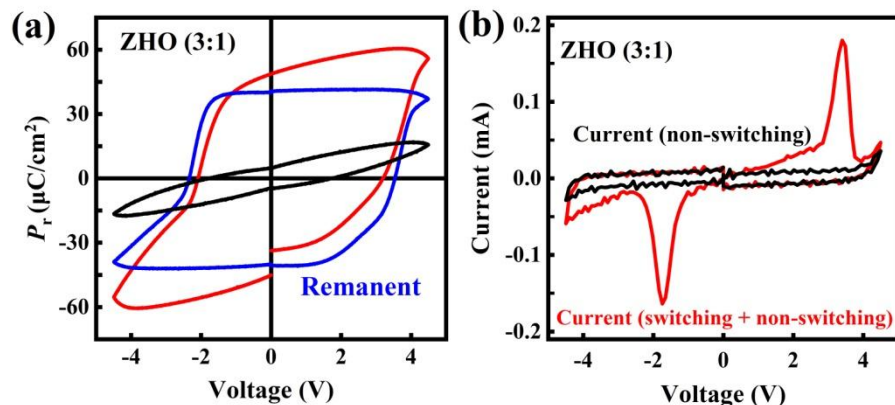

**Fig. S2** PUND measurement results of 100  $\mu\text{m}$ -sized W/ZHO (3:1)/W capacitor. (a) Polarization hysteresis curves (remanent switching  $P_r$  hysteresis curve in blue color: subtracting non-switching curve in black color from overall measured polarization curve in red color; (b) The overall and the non-switching (capacitive and leakage) current-voltage curves.

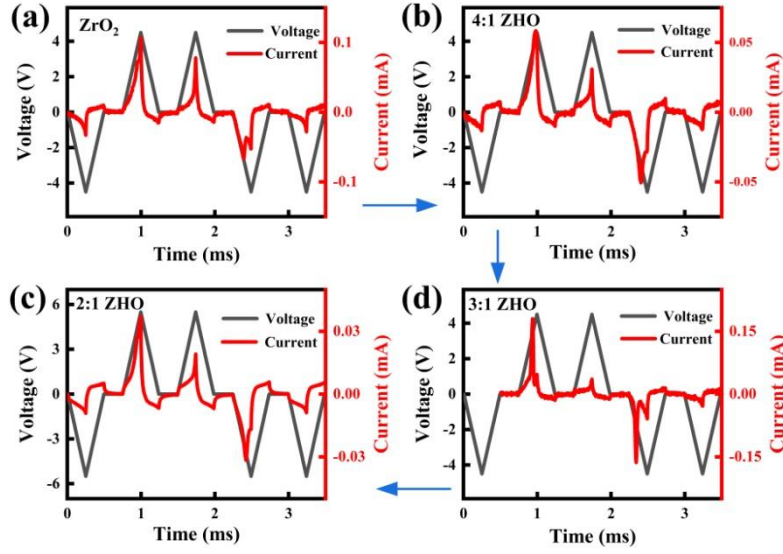

**Fig. S3** Voltage waveforms applied in PUND tests and the corresponding current response of W/ZHO/W devices with 10 nm-thick ZHO thin films with different Zr:Hf ratios. (a) ZrO<sub>2</sub>, (b) 4:1 ZHO, (c) 2:1 ZHO, (d) 3:1 ZHO.

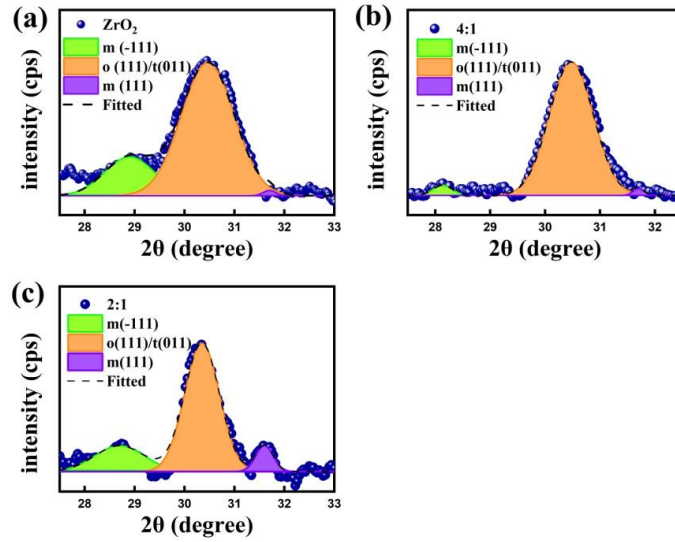

**Fig. S4** Gaussian fitting results of the GIXRD spectra of annealed thin films. (a) ZrO<sub>2</sub>, (b) 4:1 ZHO, (c) 2:1 ZHO.

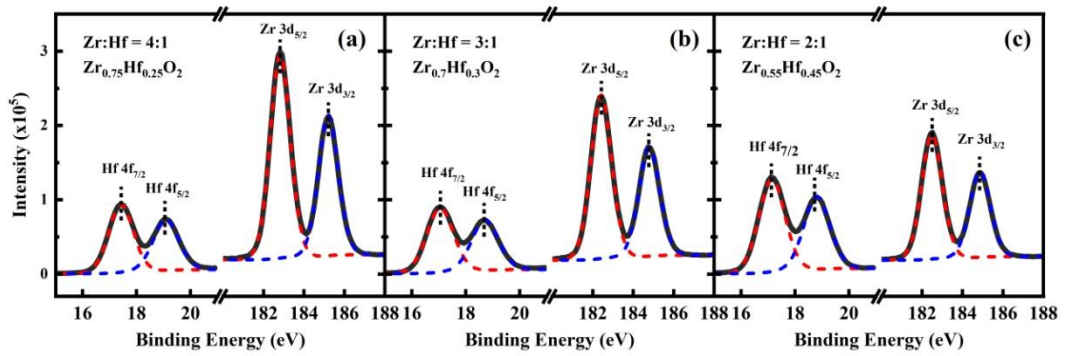

**Fig. S5** XPS spectra of annealed ZHO films with different Zr:Hf cycle ratios. (a) 4:1, (b) 3:1, (c) 2:1. The corresponding actual compositions are calculated based on the ratio of Zr 3d/Hf 4f.

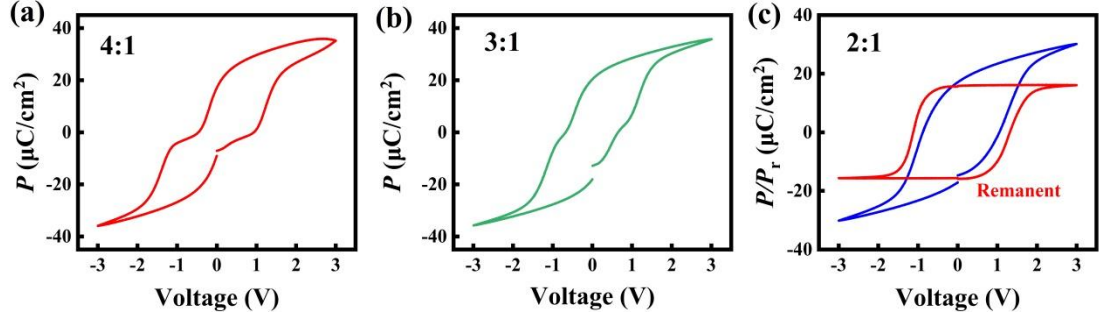

**Fig. S6** Ferroelectric characteristics of PMA-treated W/ZHO/W devices. (a) Pristine P-V hysteresis loop of 4:1 ZHO. (b) Pristine P-V hysteresis loop of 3:1 ZHO. (c) Hysteresis loops of pristine P-V (in blue) and PUND-measured remanent  $P_r$ -V (in red) for 2:1 ZHO films.

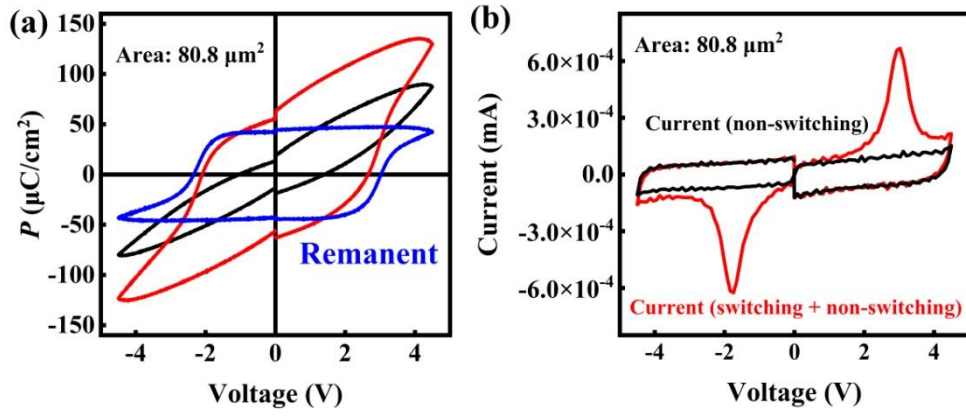

**Fig. S7** PUND measurement results of a W/ZHO (3:1)/W capacitor in array. (a) Polarization hysteresis curves. Remanent switching  $P_r$  hysteresis curve in blue was extracted by subtracting non-switching curve in black from overall polarization curve in red. (b) The overall and the non-switching (capacitive and leakage) current-voltage curves.
